# Supplementary material for: Where does the water go? A computational study on the reactivity of a ruthenium(v) oxo complex (bpc)(bpy)RuVO
Source: Royal Society of Chemistry journal article supplement (doi:10.1039/c4cp01183j), 2014-01-01
Supplement: c4cp01183j1.pdf [file c4cp01183j1.pdf]

## Where does the Water go? A Computational Study on the Reactivity of a Ruthenium(V) Oxo Complex (bpc)(bpy)Ru<sup>V</sup>O

Ying Wang and Mårten S. G. Ahlquist\*

Division of Theoretical Chemistry & Biology, School of Biotechnology, KTH Royal Institute of Technology, 106 91 Stockholm, Sweden.

### Computational details

All Density Functional Theory (DFT) calculations were carried out with Jaguar 7.6 program package by Schrödinger LLC. For geometry optimisations, solvation energies, and frequency calculations, Becke's three-parameter hybrid functional and the LYP correlation functional (B3LYP)<sup>i</sup> was used with the LACVP\*\* core potential and basis set, while single point energy corrections were performed with the M06<sup>ii</sup> functional using the LACV3P\*\*\*++ basis set which, as suggested by Martin,<sup>iii</sup> was augmented with two f-polarisation functions on Ru. Frequency calculations were performed on the optimised geometries to verify that the geometries correspond to minima or first-order saddle points (transition states) on the potential energy surface (PES). The Gibbs free energies are calculated at standard state of 1 atm (g) and 1M(aq) and the G of each species is defined as the following equation  $G = E(\text{M06/LACV3P***++ 2f on Ru}) + G_{\text{solv}} + \text{ZPE} + H_{298} - TS_{298} + 1.9 \text{ kcal/mol}$  (the 1.9 kcal/mol is a concentration correction to the free energy of solvation which by default is calculated at 1M(g) to 1M(aq) in Jaguar). Based on the gas-phase optimised structures, the effect of solvent was evaluated by single-point calculations using the Poisson-Boltzmann reactive field implemented in Jaguar 7.6 (PBF)<sup>iv</sup> with the standard settings for water. For the water molecule we used free energy of vaporisation of -2.05 kcal/mol, which is the free energy of transferring H<sub>2</sub>O(g) at 1 atm and H<sub>2</sub>O (liq) at 55.5 M at 298.15 K.<sup>v</sup> We have used the electron convention throughout the paper, meaning that the free energy of the electron was assumed to be zero. For activation strain analysis, the activation energy  $E_{\text{act}}$  is defined as the difference in single point energy  $E(\text{M06/LACV3P***++ 2f on Ru})$  between the separated reactants and the transition state geometry in vacuum. The destabilising strain energy  $E_{\text{strain}}$  is defined as the difference in single point energy  $E(\text{M06/LACV3P***++ 2f on Ru})$  between the separated reactants and corresponding geometrical parts in transition state in vacuum, respectively. For the proton we used the experimental free energy of solvation -264.0 kcal/mol at standard state conditions.

Our choice of M06 for the final energy corrections was based on previous studies that found M06 and PBE0 to be more reliable than other tested functionals (JCTC, 2013, 9, 1872). We also performed tests to validate M06, B3LYP and PBE0 for the specific system of the current study (Figure S2) and a four relevant transformations of water. M06 was the functional with the lowest error. Of special importance is the reduction potentials from III to IV and IV to V. Both B3LYP and PBE0 overestimates these potentials quite substantially, which we believe could cause artificially facile oxidations of other species, such as water. In almost all cases the larger basis set (LACV3P\*\*\*++ 2f on Ru) improved the result compared to the smaller (LACVP\*\*).

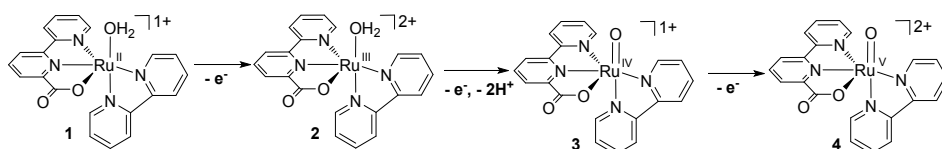

Figure S1. The oxidation steps of **1**.

|                                         | Ru <sup>II/III</sup> | differenc<br>e | Ru <sup>III/IV</sup> | differenc<br>e | Ru <sup>IV/V</sup> | differenc<br>e |
|-----------------------------------------|----------------------|----------------|----------------------|----------------|--------------------|----------------|
| Experimental data(V)                    | 0.80                 |                | 1.40                 |                | 1.60               |                |
| M06/lacv3p <sup>***++(2f)</sup> (V)     | 0.83                 | 0.03           | 1.52                 | 0.12           | 1.77               | 0.17           |
| b3lyp/lacv3p <sup>***++(2f)</sup> d3(V) | 0.80                 | 0.00           | 1.66                 | 0.26           | 1.80               | 0.20           |
| b3lyp/lacvp <sup>**</sup> (V)           | 0.68                 | -0.12          | 1.84                 | 0.44           | 1.80               | 0.20           |
| b3lyp/lacv3p <sup>***++(2f)</sup> (V)   | 0.80                 | 0.00           | 1.78                 | 0.38           | 1.84               | 0.24           |
| M06/lacvp <sup>**</sup> (V)             | 0.69                 | -0.11          | 1.62                 | 0.22           | 1.75               | 0.15           |
| PBE0/lacv3p <sup>***++(V)</sup>         | 0.76                 | -0.04          | 1.76                 | 0.36           | 1.81               | 0.21           |
| PBE0/lacv3p <sup>***++</sup> d3(V)      | 0.75                 | -0.05          | 1.67                 | 0.27           | 1.79               | 0.19           |

Table S1. Calculated redox potentials for the oxidation steps of **1** (Figure S1) with different methods and basis set. All calculated potential values are referred to NHE.

|                                         | H <sub>2</sub> O(aq)→<br>●OH(g) +H <sup>+</sup> (aq) | difference | 2H <sub>2</sub> O(aq)→<br>●OOH(g) +3H <sup>+</sup> (aq) | difference | 2H <sub>2</sub> O(aq)→<br>O <sub>2</sub> (g) +4H <sup>+</sup> (aq) | difference | H <sub>2</sub> O(aq)→ OH <sup>-</sup><br>(aq) +H <sup>+</sup> (aq) | difference |
|-----------------------------------------|------------------------------------------------------|------------|---------------------------------------------------------|------------|--------------------------------------------------------------------|------------|--------------------------------------------------------------------|------------|
| Experimental data (V)                   | 2.81                                                 |            | 1.64                                                    |            | 1.23                                                               |            | 19.0 kcal/mol                                                      |            |
| M06/lacv3p <sup>***++(2f)</sup> (V)     | 2.70                                                 | -0.11      | 1.72                                                    | 0.08       | 1.28                                                               | 0.05       | 19.3 kcal/mol                                                      | 0.3        |
| b3lyp/lacv3p <sup>***++(2f)</sup> d3(V) | 2.69                                                 | -0.12      | 1.72                                                    | 0.08       | 1.30                                                               | 0.07       | 17.7 kcal/mol                                                      | -1.3       |
| b3lyp/lacvp <sup>**</sup> (V)           | 2.55                                                 | -0.26      | 1.51                                                    | -0.13      | 1.11                                                               | -0.12      | 57.9 kcal/mol                                                      | 38.9       |
| b3lyp/lacv3p <sup>***++(2f)</sup> (V)   | 2.68                                                 | -0.13      | 1.73                                                    | 0.09       | 1.30                                                               | 0.07       | 17.5 kcal/mol                                                      | -1.5       |
| M06/lacvp <sup>**</sup> (V)             | 2.62                                                 | -0.19      | 1.56                                                    | -0.08      | 1.14                                                               | -0.09      | 57.2 kcal/mol                                                      | 38.2       |
| PBE0/lacv3p <sup>***++(V)</sup>         | 2.59                                                 | -0.22      | 1.61                                                    | -0.03      | 1.18                                                               | -0.05      | 20.8 kcal/mol                                                      | 1.8        |
| PBE0/lacv3p <sup>***++</sup> d3(V)      | 2.60                                                 | -0.21      | 1.61                                                    | -0.03      | 1.18                                                               | -0.05      | 20.9 kcal/mol                                                      | 1.9        |

Table S2. Calculated redox potentials for the oxidation of water with different methods and basis set.

All calculated potential values are referred to NHE. The experimental values are from Hoare, J. P. In *Standard Potentials in Aqueous Solution*; Bard, A. J., Parsons, R., Jordan, J., Eds.; Marcel Dekker: New York, 1985; *Handbook of Chemistry and Physics*, 67th ed.; Weast, C. R., Ed.; CRC Press: Boca Raton, FL, 1986.

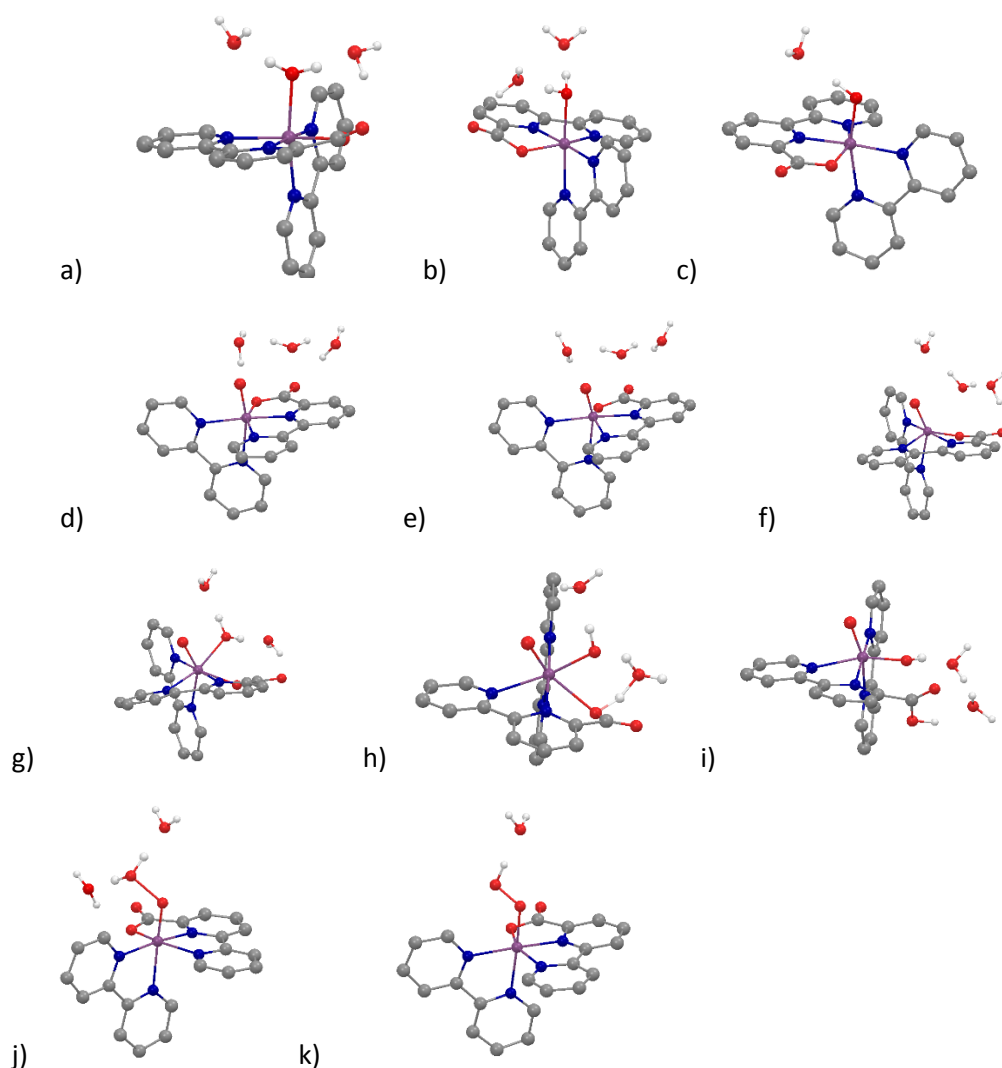

Figure S2. Optimised geometries of a) **1**; b) **2**; c) **2'**; d) **3**; e) **4**; f) **ts5**; g) **6**; h) **ts7**; i) **8**; j) **ts9**; k) **10**. Hydrogen atoms except the migrating H are omitted for clarity. (Purple = Fe; Red = O; Blue = N; Green = P; Yellow = S; Grey = C; White = H). The bond lengths are given in Å.

**Cartesian coordinates in Å and energies in atomic units unless stated otherwise of the calculated geometries.**

### Figure S1a

**E (M06/LACV3P\*\*++ 2f(Ru)) = -1501.30367241688**

**ZPE (kcal mol<sup>-1</sup>) = 251.959**

**G<sub>solv</sub> = -0.0864438**

**DH<sub>298</sub> (kcal mol<sup>-1</sup>) = 19.151**

**DS<sub>298</sub> (cal K<sup>-1</sup> mol<sup>-1</sup>) = 193.271**

Cartesian coordinates

| atom | x            | y            | z            |
|------|--------------|--------------|--------------|
| Ru1  | 3.4570286793 | 5.9941720223 | 1.7118276224 |
| N2   | 2.4764436111 | 5.0323675762 | 3.2577943631 |

|     |               |               |               |
|-----|---------------|---------------|---------------|
| C3  | 3.0536477240  | 4.5892031544  | 4.3922077288  |
| H4  | 4.1135289868  | 4.7875979396  | 4.4942303503  |
| C5  | 2.3493173324  | 3.9101451247  | 5.3772576996  |
| H6  | 2.8642911353  | 3.5735665309  | 6.2704848957  |
| C7  | 0.9884750546  | 3.6717294041  | 5.1867872515  |
| H8  | 0.4076273014  | 3.1413242215  | 5.9342429554  |
| C9  | 0.3852326402  | 4.1234511583  | 4.0181495735  |
| H10 | -0.6699883641 | 3.9459116849  | 3.8504565938  |
| C11 | 1.1439266131  | 4.8036740913  | 3.0601522341  |
| C12 | 0.5914009402  | 5.3203418283  | 1.7941831212  |
| C13 | -0.7433813401 | 5.1800682448  | 1.4018843739  |
| H14 | -1.4507995510 | 4.6603165374  | 2.0369010539  |
| C15 | -1.1604077424 | 5.7084081491  | 0.1844753368  |
| H16 | -2.1933555258 | 5.6023903612  | -0.1306331591 |
| C17 | -0.2316746472 | 6.3692278478  | -0.6215602818 |
| H18 | -0.5145729106 | 6.7919977531  | -1.5792278608 |
| C19 | 1.0815603536  | 6.4765738005  | -0.1791462544 |
| H20 | 1.8568599768  | 6.9669464682  | -0.7577235832 |
| N21 | 1.4873498101  | 5.9674918570  | 1.0003519180  |
| N22 | 5.3143079709  | 5.9085891702  | 2.4411430071  |
| C23 | 6.0792875493  | 4.8763104791  | 2.0448168593  |
| C24 | 7.3899621467  | 4.7610325837  | 2.4967912657  |
| H25 | 7.9971611347  | 3.9328243964  | 2.1493441833  |
| C26 | 7.8755866069  | 5.7370908740  | 3.3742905699  |
| H27 | 8.8890818277  | 5.6694001630  | 3.7571810744  |
| C28 | 7.0721766904  | 6.8201264942  | 3.7420228133  |
| H29 | 7.4648586908  | 7.5903555581  | 4.3960620766  |
| C30 | 5.7679400494  | 6.8982207074  | 3.2422548519  |
| C31 | 4.7706839581  | 7.9682041821  | 3.4589118213  |
| C32 | 4.9982252813  | 9.0851625118  | 4.2648788824  |
| H33 | 5.9462933268  | 9.1959547602  | 4.7792302104  |
| C34 | 4.0068738114  | 10.0520050541 | 4.4057804057  |
| H35 | 4.1754034279  | 10.9223296830 | 5.0318811623  |

|     |              |               |               |
|-----|--------------|---------------|---------------|
| C36 | 2.7990057490 | 9.8816317924  | 3.7299875551  |
| H37 | 1.9987019950 | 10.6093972505 | 3.8096786946  |
| C38 | 2.6264445565 | 8.7495666725  | 2.9407519956  |
| H39 | 1.7055095152 | 8.5731172656  | 2.3960631080  |
| N40 | 3.5759870835 | 7.8062870875  | 2.7992083030  |
| C41 | 5.4053826291 | 3.9900857713  | 0.9998323251  |
| O42 | 4.1311032417 | 4.1713928715  | 0.8482771284  |
| O43 | 6.1212725476 | 3.2568313161  | 0.3104931464  |
| O44 | 4.1746123335 | 6.8475801820  | -0.1610863076 |
| H45 | 4.8750773181 | 7.5340202452  | -0.0782328151 |
| H46 | 4.5635830693 | 6.1334006325  | -0.7428712588 |
| O54 | 6.2500649361 | 8.6125958443  | 0.0365759557  |
| H55 | 6.9967311647 | 8.2312876762  | -0.4453840669 |
| H56 | 6.1156536853 | 9.4838351208  | -0.3594671894 |
| O50 | 5.3514635932 | 5.0456808456  | -1.7946127094 |
| H51 | 5.6780689449 | 4.2827189371  | -1.2730081669 |
| H52 | 4.7038069391 | 4.6611383273  | -2.3993059294 |

**Figure S1b**

**E (M06/LACV3P\*\*++ 2f(Ru)) = -1500.97786853401**

**ZPE (kcal mol<sup>-1</sup>) = 252.318**

**G<sub>solv</sub> = -0.2281864**

**DH<sub>298</sub> (kcal mol<sup>-1</sup>) = 19.088**

**DS<sub>298</sub> (cal K<sup>-1</sup> mol<sup>-1</sup>) = 191.916**

Cartesian coordinates

| atom | x            | y            | z            |
|------|--------------|--------------|--------------|
| Ru1  | 3.4550806617 | 6.0162643348 | 1.7067174656 |
| N2   | 2.4321953179 | 5.0953045818 | 3.2712167897 |
| C3   | 2.9933697806 | 4.7040907638 | 4.4299994164 |
| H4   | 4.0392786574 | 4.9507331048 | 4.5670607298 |
| C5   | 2.2810495953 | 4.0123625143 | 5.4017048567 |
| H6   | 2.7734819921 | 3.7138841979 | 6.3206814256 |
| C7   | 0.9406292678 | 3.7114838253 | 5.1614608248 |
| H8   | 0.3560582544 | 3.1676661747 | 5.8965230736 |

|     |               |               |               |
|-----|---------------|---------------|---------------|
| C9  | 0.3582940109  | 4.1145134886  | 3.9628069776  |
| H10 | -0.6809376884 | 3.8849698525  | 3.7628331849  |
| C11 | 1.1228264740  | 4.8086817090  | 3.0212593472  |
| C12 | 0.6028152522  | 5.2811143992  | 1.7247590009  |
| C13 | -0.7054335662 | 5.0845234156  | 1.2798905051  |
| H14 | -1.4211550382 | 4.5472643752  | 1.8901715839  |
| C15 | -1.0882297445 | 5.5808528765  | 0.0349633865  |
| H16 | -2.1025594679 | 5.4294324051  | -0.3202518994 |
| C17 | -0.1575807564 | 6.2682315799  | -0.7452638297 |
| H18 | -0.4200749317 | 6.6682761494  | -1.7180825836 |
| C19 | 1.1328482888  | 6.4306256736  | -0.2540303118 |
| H20 | 1.9068765527  | 6.9469622376  | -0.8105242272 |
| N21 | 1.5014583152  | 5.9502600975  | 0.9497189775  |
| N22 | 5.3617056381  | 5.9426969350  | 2.4164052367  |
| C23 | 6.0937091872  | 4.8914972817  | 2.0203141570  |
| C24 | 7.4291190401  | 4.7797596759  | 2.3904177741  |
| H25 | 8.0127263520  | 3.9300203289  | 2.0532951731  |
| C26 | 7.9662694326  | 5.7899570836  | 3.1983409067  |
| H27 | 9.0015236060  | 5.7326289742  | 3.5198623316  |
| C28 | 7.1838620485  | 6.8804111622  | 3.5912235808  |
| H29 | 7.6117038356  | 7.6614545153  | 4.2095108020  |
| C30 | 5.8503818224  | 6.9454026374  | 3.1705132096  |
| C31 | 4.8508078760  | 7.9988461842  | 3.4493178691  |
| C32 | 5.1012057929  | 9.1312211519  | 4.2227333866  |
| H33 | 6.0820199287  | 9.2883202549  | 4.6571355380  |
| C34 | 4.0815852263  | 10.0583972022 | 4.4361976172  |
| H35 | 4.2663768822  | 10.9428009417 | 5.0376664091  |
| C36 | 2.8260840330  | 9.8322568330  | 3.8739387515  |
| H37 | 2.0068327314  | 10.5275876457 | 4.0197091910  |
| C38 | 2.6298514319  | 8.6823747282  | 3.1150083489  |
| H39 | 1.6709799590  | 8.4597216987  | 2.6603678080  |
| N40 | 3.6129271168  | 7.7902203310  | 2.8983078506  |
| C41 | 5.3200701534  | 3.9561615597  | 1.1112292184  |

|     |              |              |               |
|-----|--------------|--------------|---------------|
| O42 | 4.0053080007 | 4.1714565108 | 1.1275333909  |
| O43 | 5.8750221466 | 3.1369045004 | 0.4076668682  |
| O44 | 4.2212151706 | 6.8722728014 | -0.0968532428 |
| H45 | 4.9862453301 | 7.5037218914 | -0.0248277497 |
| H46 | 4.4946594368 | 6.1614901058 | -0.7566099940 |
| O54 | 6.3040323125 | 8.5411825561 | 0.1189612529  |
| H55 | 7.0880065499 | 8.2569082088 | -0.3723920856 |
| H56 | 6.1491775320 | 9.4529661323 | -0.1659252274 |
| O50 | 5.1329849963 | 5.0369559863 | -1.7312923925 |
| H51 | 5.3107664371 | 4.1471934517 | -1.3821046299 |
| H52 | 4.8974986024 | 4.9297515904 | -2.6615698222 |

**Figure S1c**

**E (M06/LACV3P\*\*++ 2f(Ru)) = -1499.34855671183**

**ZPE (kcal mol<sup>-1</sup>) = 230.426**

**G<sub>solv</sub> = -0.0928285**

**DH<sub>298</sub> (kcal mol<sup>-1</sup>) = 18.231**

**DS<sub>298</sub> (cal K<sup>-1</sup> mol<sup>-1</sup>) = 189.768**

Cartesian coordinates

| atom | x                | y               | z               |
|------|------------------|-----------------|-----------------|
| Ru1  | 3.5029441430000  | 5.8674925740000 | 1.6472918943000 |
| N2   | 2.3608745292000  | 5.1679326470000 | 3.3548920294000 |
| C3   | 2.8686173943000  | 4.7955050448000 | 4.5412993056000 |
| H4   | 3.9421151846000  | 4.9016731148000 | 4.6551348219000 |
| C5   | 2.0800484597000  | 4.2937163244000 | 5.5692036930000 |
| H6   | 2.5345811072000  | 4.0009974097000 | 6.5092570261000 |
| C7   | 0.7072455350000  | 4.1741453234000 | 5.3532467607000 |
| H8   | 0.0577344729000  | 3.7844178142000 | 6.1306569223000 |
| C9   | 0.1762144866000  | 4.5566375438000 | 4.1256674040000 |
| H10  | -0.8874868204000 | 4.4646308713000 | 3.9454729253000 |
| C11  | 1.0253827827000  | 5.0517269391000 | 3.1290911576000 |
| C12  | 0.5540796135000  | 5.4726545932000 | 1.7907370611000 |
| C13  | -0.7774148915000 | 5.3957781735000 | 1.3722783948000 |
| H14  | -1.5433992747000 | 5.0139744617000 | 2.0362277034000 |
| C15  | -1.1150242250000 | 5.8047842474000 | 0.0848731763000 |

|     |                  |                  |                  |
|-----|------------------|------------------|------------------|
| H16 | -2.1453630657000 | 5.7450291055000  | -0.2508049583000 |
| C17 | -0.1155352898000 | 6.2798668914000  | -0.7638525814000 |
| H18 | -0.3371401673000 | 6.5979465463000  | -1.7763685788000 |
| C19 | 1.1922789470000  | 6.3338494518000  | -0.2921843468000 |
| H20 | 2.0314303506000  | 6.6758263621000  | -0.8897645027000 |
| N21 | 1.5119003140000  | 5.9483499318000  | 0.9546040461000  |
| N22 | 5.3748068858000  | 5.6134100962000  | 2.3082065552000  |
| C23 | 5.9249140837000  | 4.4183353988000  | 2.0466224811000  |
| C24 | 7.2346234789000  | 4.1570543305000  | 2.4328879446000  |
| H25 | 7.6619262171000  | 3.1843555814000  | 2.2158144090000  |
| C26 | 7.9426948842000  | 5.1649254314000  | 3.0965233075000  |
| H27 | 8.9665360866000  | 4.9913701654000  | 3.4125765396000  |
| C28 | 7.3401257235000  | 6.3967610632000  | 3.3648157413000  |
| H29 | 7.8910397689000  | 7.1714097556000  | 3.8862361574000  |
| C30 | 6.0212358284000  | 6.6073888592000  | 2.9496727382000  |
| C31 | 5.1846806692000  | 7.8107919257000  | 3.1447949543000  |
| C32 | 5.6295028124000  | 8.9720195465000  | 3.7800313723000  |
| H33 | 6.6454130792000  | 9.0315635199000  | 4.1531516082000  |
| C34 | 4.7623726217000  | 10.0511163786000 | 3.9277943781000  |
| H35 | 5.1000173639000  | 10.9580110445000 | 4.4192468070000  |
| C36 | 3.4612262290000  | 9.9505541632000  | 3.4370231168000  |
| H37 | 2.7563026948000  | 10.7690568841000 | 3.5301283725000  |
| C38 | 3.0739565722000  | 8.7691097350000  | 2.8131805594000  |
| H39 | 2.0768745652000  | 8.6398325317000  | 2.4075180707000  |
| N40 | 3.9041394239000  | 7.7243420934000  | 2.6682515538000  |
| C41 | 4.9825151531000  | 3.4331200087000  | 1.3572549393000  |
| O42 | 3.7577567088000  | 3.8920362874000  | 1.1641359082000  |
| O43 | 5.3830919205000  | 2.3225356407000  | 1.0645815231000  |
| O44 | 4.0844260959000  | 6.6221030297000  | -0.0333805660000 |
| H46 | 5.0313331627000  | 6.8704585249000  | -0.0712516109000 |
| O50 | 6.8622249063000  | 7.1972835220000  | -0.2718294386000 |
| H51 | 7.1765595929000  | 6.4749668354000  | -0.8323677538000 |
| H52 | 7.0023292246000  | 7.9936497789000  | -0.8012256460000 |

**Figure S1d**

**E (M06/LACV3P\*\*++ 2f(Ru)) = -1576.45417544406**

**ZPE (kcal mol<sup>-1</sup>) = 253.363**

**G<sub>solv</sub> = -0.0964913**



**DH<sub>298</sub> (kcal mol<sup>-1</sup>)= 20.335**

**DS<sub>298</sub> (cal K<sup>-1</sup> mol<sup>-1</sup>)= 202.234**

Cartesian coordinates

| atom | x             | y            | z             |
|------|---------------|--------------|---------------|
| Ru1  | 3.1242869367  | 6.0779903354 | 1.6666441832  |
| N2   | 2.3670137598  | 4.9967068853 | 3.4835532560  |
| C3   | 3.1228630502  | 4.4097933051 | 4.4234577472  |
| H4   | 4.1969956578  | 4.4918871638 | 4.2933357634  |
| C5   | 2.5813466182  | 3.7263722743 | 5.5061447069  |
| H6   | 3.2330087515  | 3.2650976827 | 6.2398284568  |
| C7   | 1.1935282797  | 3.6521989849 | 5.6122279173  |
| H8   | 0.7281944892  | 3.1285057581 | 6.4413060475  |
| C9   | 0.4055484422  | 4.2577630078 | 4.6387341870  |
| H10  | -0.6734912534 | 4.2057596621 | 4.7123810136  |
| C11  | 1.0162264924  | 4.9275298670 | 3.5725794554  |
| C12  | 0.2550219557  | 5.5913049684 | 2.4881919624  |
| C13  | -1.1401775863 | 5.5607689061 | 2.3996881804  |
| H14  | -1.7281696964 | 5.0383346220 | 3.1437446632  |
| C15  | -1.7747221697 | 6.1959342538 | 1.3356350331  |
| H16  | -2.8568261523 | 6.1722035122 | 1.2548364476  |
| C17  | -1.0031934581 | 6.8495754180 | 0.3766096493  |
| H18  | -1.4562302129 | 7.3476409302 | -0.4733508322 |
| C19  | 0.3805105752  | 6.8476297829 | 0.5165389556  |
| H20  | 1.0412310881  | 7.3215274627 | -0.2020575343 |
| N21  | 0.9917534066  | 6.2398446140 | 1.5495765323  |
| N22  | 5.0768156785  | 5.6673276389 | 1.8964064406  |
| C23  | 5.5154636421  | 4.5480182571 | 1.3108257893  |
| C24  | 6.8674374548  | 4.2129301476 | 1.3873198546  |
| H25  | 7.2292279152  | 3.3241490405 | 0.8841294286  |
| C26  | 7.7218342626  | 5.0887025303 | 2.0545694827  |
| H27  | 8.7820234346  | 4.8645087518 | 2.1165560063  |
| C28  | 7.2346708004  | 6.2645747337 | 2.6394333245  |
| H29  | 7.9104563719  | 6.9412846005 | 3.1492159583  |
| C30  | 5.8729155577  | 6.5450412672 | 2.5419884811  |
| C31  | 5.1513720014  | 7.7198541428 | 3.0828926521  |
| C32  | 5.7809877796  | 8.7599746238 | 3.7680464282  |
| H33  | 6.8526197435  | 8.7366224716 | 3.9267426971  |
| C34  | 5.0237945981  | 9.8328660669 | 4.2334542234  |

|     |              |               |               |
|-----|--------------|---------------|---------------|
| H35 | 5.5046004983 | 10.6502964891 | 4.7613357726  |
| C36 | 3.6487721602 | 9.8452113731  | 4.0083119268  |
| H37 | 3.0253417963 | 10.6644142361 | 4.3488715682  |
| C38 | 3.0772520599 | 8.7777652523  | 3.3217629663  |
| H39 | 2.0140615623 | 8.7413986209  | 3.1109182785  |
| N40 | 3.7997801433 | 7.7423059423  | 2.8730374411  |
| C41 | 4.4241945349 | 3.7217746260  | 0.6423758487  |
| O42 | 3.2070995754 | 4.2240040116  | 0.7212064086  |
| O43 | 4.6814521683 | 2.6448842830  | 0.1211004278  |
| O44 | 3.3199461233 | 7.0492651650  | 0.1914252700  |
| O45 | 5.5705747565 | 5.3747452919  | -1.2961042273 |
| H46 | 6.1129943362 | 4.6307532184  | -1.6141982104 |
| H47 | 4.7116647400 | 5.2861590518  | -1.7524393280 |
| O49 | 2.9141535063 | 4.6730315541  | -2.0991201707 |
| H50 | 2.7880769073 | 4.4107967111  | -1.1705483320 |
| H51 | 2.9325060656 | 3.8386483946  | -2.5850204841 |
| O51 | 6.9540537628 | 2.8719403956  | -1.4679991827 |
| H52 | 6.1616673092 | 2.5109240199  | -1.0296253665 |
| H53 | 7.1455259868 | 2.2874883273  | -2.2112435746 |

**Figure S1e**

**E (M06/LACV3P\*\*++ 2f(Ru)) = -1576.102741342**

**ZPE (kcal mol<sup>-1</sup>) = 253.165**

**G<sub>solv</sub> = -0.2274867**

**DH<sub>298</sub> (kcal mol<sup>-1</sup>) = 20.577**

**DS<sub>298</sub> (cal K<sup>-1</sup> mol<sup>-1</sup>) = 203.764**

Cartesian coordinates

| atom | x             | y            | z            |
|------|---------------|--------------|--------------|
| Ru1  | 3.2003651395  | 6.0607005873 | 1.6121414792 |
| N2   | 2.3950378053  | 5.1884780592 | 3.4782983160 |
| C3   | 3.1437145287  | 4.7513727656 | 4.5058688747 |
| H4   | 4.2152226100  | 4.8904660562 | 4.4200279270 |
| C5   | 2.5877810533  | 4.1414633228 | 5.6227083918 |
| H6   | 3.2282135193  | 3.7959660382 | 6.4266479358 |
| C7   | 1.2026373524  | 3.9843112736 | 5.6723672111 |
| H8   | 0.7299746726  | 3.5111635861 | 6.5273130773 |
| C9   | 0.4277719690  | 4.4412276916 | 4.6103304083 |
| H10  | -0.6484828640 | 4.3261835422 | 4.6411907995 |

|     |               |               |               |
|-----|---------------|---------------|---------------|
| C11 | 1.0459741909  | 5.0443399952  | 3.5104435933  |
| C12 | 0.3102880757  | 5.5565824034  | 2.3362078896  |
| C13 | -1.0738506640 | 5.4563279522  | 2.1851138778  |
| H14 | -1.6787352361 | 4.9828564400  | 2.9484135207  |
| C15 | -1.6785234694 | 5.9624294475  | 1.0360542398  |
| H16 | -2.7538862247 | 5.8868686050  | 0.9098253396  |
| C17 | -0.8866822148 | 6.5564398746  | 0.0559474594  |
| H18 | -1.3173361145 | 6.9584794288  | -0.8543056436 |
| C19 | 0.4883668321  | 6.6268062584  | 0.2558846853  |
| H20 | 1.1556532264  | 7.0602412861  | -0.4791078349 |
| N21 | 1.0644406259  | 6.1487529831  | 1.3734629727  |
| N22 | 5.1442054287  | 5.6184282129  | 1.9386907068  |
| C23 | 5.5710576517  | 4.4899649318  | 1.3636785106  |
| C24 | 6.9226894688  | 4.1645493103  | 1.3888440860  |
| H25 | 7.2706745112  | 3.2708568731  | 0.8846940880  |
| C26 | 7.7899384763  | 5.0577483189  | 2.0254674349  |
| H27 | 8.8535364722  | 4.8428855204  | 2.0564459141  |
| C28 | 7.3113919283  | 6.2285586574  | 2.6296240430  |
| H29 | 7.9967772037  | 6.9075621862  | 3.1233659567  |
| C30 | 5.9443909510  | 6.5025088144  | 2.5717457320  |
| C31 | 5.2119582501  | 7.6486252974  | 3.1459022197  |
| C32 | 5.8086671951  | 8.6764650274  | 3.8737073399  |
| H33 | 6.8805785234  | 8.6794446566  | 4.0344659604  |
| C34 | 5.0145017529  | 9.7021516133  | 4.3882335780  |
| H35 | 5.4690994929  | 10.5114971858 | 4.9507279621  |
| C36 | 3.6378620935  | 9.6772227981  | 4.1715778881  |
| H37 | 2.9894307307  | 10.4589784891 | 4.5514882101  |
| C38 | 3.0941126730  | 8.6262572420  | 3.4376125324  |
| H39 | 2.0321500796  | 8.5676340103  | 3.2270290010  |
| N40 | 3.8582632606  | 7.6425263351  | 2.9420942718  |
| C41 | 4.4481997415  | 3.6741572082  | 0.7662117016  |
| O42 | 3.2120818384  | 4.2147943993  | 0.9960753324  |
| O43 | 4.5769967757  | 2.5970486981  | 0.2441593616  |
| O44 | 3.3346798277  | 7.2104139368  | 0.3471969575  |
| O45 | 5.0595599112  | 5.2794333031  | -1.1363446223 |
| H46 | 5.6723224769  | 4.6216651380  | -1.5214042146 |
| H47 | 4.2095653174  | 5.1832485578  | -1.6073840983 |
| O49 | 2.3921052590  | 4.8250201638  | -1.9443648145 |

|     |              |              |               |
|-----|--------------|--------------|---------------|
| H50 | 2.2739710335 | 3.9067902890 | -1.6644458727 |
| H51 | 2.1539468323 | 4.8359701552 | -2.8818418194 |
| O51 | 6.7550180960 | 3.1032562667 | -1.6053335173 |
| H52 | 6.1770681903 | 2.3464266506 | -1.4354026449 |
| H53 | 7.2950175685 | 2.8642847547 | -2.3702419041 |

**Figure S1f**

**E (M06/LACV3P\*\*++ 2f(Ru)) = -1576.09641357245**

**ZPE (kcal mol<sup>-1</sup>) = 253.432**

**G<sub>solv</sub> = -0.2297897**

**DH<sub>298</sub> (kcal mol<sup>-1</sup>) = 19.836**

**DS<sub>298</sub> (cal K<sup>-1</sup> mol<sup>-1</sup>) = 196.632**

Cartesian coordinates

| atom | x             | y            | z             |
|------|---------------|--------------|---------------|
| Ru1  | 3.5782105470  | 5.8977256399 | 1.5926420688  |
| N2   | 2.4030957192  | 5.3235620521 | 3.3554154954  |
| C3   | 2.9197319815  | 5.1054717033 | 4.5772368536  |
| H4   | 3.9832835346  | 5.2765053626 | 4.6946176737  |
| C5   | 2.1387700823  | 4.6740329351 | 5.6409786333  |
| H6   | 2.5919384986  | 4.5031942510 | 6.6112240508  |
| C7   | 0.7763154288  | 4.4640572625 | 5.4233895423  |
| H8   | 0.1336355592  | 4.1261096509 | 6.2301669961  |
| C9   | 0.2459834993  | 4.6909242309 | 4.1572469601  |
| H10  | -0.8101772239 | 4.5322075253 | 3.9782576244  |
| C11  | 1.0824838160  | 5.1208851115 | 3.1216144616  |
| C12  | 0.6191275992  | 5.3813233142 | 1.7440620485  |
| C13  | -0.6929178180 | 5.1812150039 | 1.3141021788  |
| H14  | -1.4478947521 | 4.8137443923 | 1.9980088752  |
| C15  | -1.0272389234 | 5.4477051706 | -0.0125170465 |
| H16  | -2.0442853700 | 5.2921663307 | -0.3579721404 |
| C17  | -0.0420601924 | 5.9058255118 | -0.8837205966 |
| H18  | -0.2609579176 | 6.1175059723 | -1.9242963171 |
| C19  | 1.2525087629  | 6.0881895431 | -0.4055282143 |
| H20  | 2.0597172670  | 6.4227321355 | -1.0517978787 |
| N21  | 1.5625171448  | 5.8387536882 | 0.8803686034  |
| N22  | 5.4318178800  | 5.6097176365 | 2.3746494992  |
| C23  | 5.9667527964  | 4.4051764278 | 2.1521794474  |
| C24  | 7.2859788925  | 4.1493931332 | 2.5055325261  |

|     |              |               |               |
|-----|--------------|---------------|---------------|
| H25 | 7.7163535114 | 3.1718941039  | 2.3179394929  |
| C26 | 8.0046683331 | 5.1880920277  | 3.1106897998  |
| H27 | 9.0392726478 | 5.0309086211  | 3.3994588228  |
| C28 | 7.4001238765 | 6.4226511796  | 3.3779944414  |
| H29 | 7.9586830082 | 7.2051840626  | 3.8790321051  |
| C30 | 6.0698893316 | 6.6199089676  | 2.9974533329  |
| C31 | 5.2001056505 | 7.7883175371  | 3.2445308199  |
| C32 | 5.5983606619 | 8.9483009275  | 3.9057678339  |
| H33 | 6.6210662963 | 9.0558066320  | 4.2485982163  |
| C34 | 4.6716110670 | 9.9686309116  | 4.1222942388  |
| H35 | 4.9740494833 | 10.8780524557 | 4.6318118427  |
| C36 | 3.3603472232 | 9.8088420541  | 3.6778956979  |
| H37 | 2.6134196122 | 10.5812001393 | 3.8247099221  |
| C38 | 3.0151437139 | 8.6321949403  | 3.0175072825  |
| H39 | 2.0164682449 | 8.4650233375  | 2.6306755787  |
| N40 | 3.9085577074 | 7.6545629766  | 2.8150353233  |
| C41 | 4.9659550948 | 3.4289030274  | 1.5784800620  |
| O42 | 3.7158928722 | 3.9218208077  | 1.5396273655  |
| O43 | 5.2502278733 | 2.3015136948  | 1.2506424208  |
| O44 | 3.8887299190 | 7.0614218445  | 0.3488304567  |
| O45 | 4.9407452506 | 4.8034454594  | -0.7416872626 |
| H46 | 4.6464368486 | 3.9265885334  | -1.0830882093 |
| H47 | 4.6657240179 | 5.4491841136  | -1.4189286190 |
| O49 | 3.6979121308 | 6.5197206272  | -2.6511549353 |
| H50 | 4.1342580255 | 7.3565841578  | -2.8610537991 |
| H51 | 3.5940579037 | 6.0731570058  | -3.5029116846 |
| O51 | 3.9905791677 | 2.3179893433  | -1.3672160352 |
| H52 | 4.2064901352 | 1.8666650586  | -0.5357545009 |
| H53 | 4.3704886662 | 1.7653453043  | -2.0627847896 |

**Figure S1g**

**E (M06/LACV3P\*\*++ 2f(Ru)) = -1576.10281022977**

**ZPE (kcal mol<sup>-1</sup>) = 254.164**

**G<sub>solv</sub> = -0.2282873**

**DH<sub>298</sub> (kcal mol<sup>-1</sup>) = 19.624**

**DS<sub>298</sub> (cal K<sup>-1</sup> mol<sup>-1</sup>) = 193.156**

Cartesian coordinates

| atom | x | y | z |
|------|---|---|---|
|------|---|---|---|

|     |               |               |               |
|-----|---------------|---------------|---------------|
| Ru1 | 3.6311047570  | 5.8221773562  | 1.5451977002  |
| N2  | 2.3492437146  | 5.1387938266  | 3.2162487695  |
| C3  | 2.8499210477  | 4.7362206412  | 4.3952844930  |
| H4  | 3.9261775848  | 4.7817974704  | 4.5074631136  |
| C5  | 2.0315526632  | 4.2693751623  | 5.4158594235  |
| H6  | 2.4685428987  | 3.9536060474  | 6.3568351068  |
| C7  | 0.6550101838  | 4.2067701864  | 5.1924430531  |
| H8  | -0.0128151463 | 3.8390838867  | 5.9650468852  |
| C9  | 0.1437231917  | 4.6154802362  | 3.9642856826  |
| H10 | -0.9213833629 | 4.5654981147  | 3.7765887246  |
| C11 | 1.0193801650  | 5.0840011792  | 2.9783466920  |
| C12 | 0.5989818367  | 5.5496943657  | 1.6443070090  |
| C13 | -0.7283513667 | 5.5818654454  | 1.2127700235  |
| H14 | -1.5250555171 | 5.2392615882  | 1.8616835045  |
| C15 | -1.0232417876 | 6.0581881191  | -0.0626285266 |
| H16 | -2.0511610179 | 6.0860291176  | -0.4099693102 |
| C17 | 0.0172767484  | 6.4973709589  | -0.8784757838 |
| H18 | -0.1677175904 | 6.8799115577  | -1.8760284900 |
| C19 | 1.3214042677  | 6.4405176759  | -0.3977641596 |
| H20 | 2.1604509031  | 6.7617451122  | -1.0035993382 |
| N21 | 1.6016750483  | 5.9761300711  | 0.8337329660  |
| N22 | 5.5652641081  | 5.7056018850  | 2.2887605138  |
| C23 | 6.2209405490  | 4.5520360444  | 2.1253694247  |
| C24 | 7.5758494351  | 4.4573890530  | 2.4234295609  |
| H25 | 8.0960914947  | 3.5176505040  | 2.2733360943  |
| C26 | 8.2037954995  | 5.5933496898  | 2.9475803224  |
| H27 | 9.2603987855  | 5.5636282574  | 3.1949714960  |
| C28 | 7.4677366395  | 6.7533219767  | 3.2127520614  |
| H29 | 7.9431823072  | 7.6027036230  | 3.6899087538  |
| C30 | 6.1100469152  | 6.7855459473  | 2.8792361815  |
| C31 | 5.1175553587  | 7.8254842275  | 3.2123214029  |
| C32 | 5.4180873690  | 9.0387083057  | 3.8283569247  |
| H33 | 6.4482505903  | 9.3009180111  | 4.0415188272  |
| C34 | 4.3837512869  | 9.9118060939  | 4.1648400314  |
| H35 | 4.6061084481  | 10.8619276875 | 4.6401452668  |
| C36 | 3.0673871427  | 9.5507587645  | 3.8833391453  |
| H37 | 2.2361535984  | 10.2015052210 | 4.1311474032  |
| C38 | 2.8269554788  | 8.3306582347  | 3.2571369933  |

|     |              |              |               |
|-----|--------------|--------------|---------------|
| H39 | 1.8236039359 | 8.0149598116 | 2.9967089171  |
| N40 | 3.8215355749 | 7.4917450658 | 2.9374466025  |
| C41 | 5.2837999729 | 3.4285659046 | 1.7551429802  |
| O42 | 4.0152758780 | 3.7661806603 | 1.9213148468  |
| O43 | 5.6669635177 | 2.3234775368 | 1.4185199418  |
| O44 | 4.0512605697 | 7.1240334027 | 0.4492358915  |
| O45 | 3.9842108917 | 4.7211907315 | -0.3086989236 |
| H46 | 3.7204679924 | 3.7518657735 | -0.4298816340 |
| H47 | 3.9441005550 | 5.2349015991 | -1.1553291790 |
| O49 | 3.8196998075 | 6.1970311993 | -2.5528435185 |
| H50 | 4.5360869578 | 6.8392569865 | -2.6522964045 |
| H51 | 3.7527994434 | 5.7478562927 | -3.4073706508 |
| O51 | 3.7072429797 | 2.1843968667 | -0.6692309615 |
| H52 | 4.3508156287 | 1.8322764859 | -0.0262949132 |
| H53 | 2.9218710472 | 1.6277662901 | -0.5971474939 |

**Figure S1h**

**E (M06/LACV3P\*\*++ 2f(Ru)) = -1576.07675468096**

**ZPE (kcal mol<sup>-1</sup>) = 252.021**

**G<sub>solv</sub> = -0.2274033**

**DH<sub>298</sub> (kcal mol<sup>-1</sup>) = 18.932**

**DS<sub>298</sub> (cal K<sup>-1</sup> mol<sup>-1</sup>) = 187.966**

Cartesian coordinates

| atom | x                | y                | z                |
|------|------------------|------------------|------------------|
| O42  | 0.000000000000   | 0.000000000000   | 0.000000000000   |
| H52  | 0.000000000000   | 0.000000000000   | 1.2192836561000  |
| Ru1  | 2.2225475762649  | 0.000000000000   | -0.7179272024747 |
| N2   | 1.5086992065542  | -2.0543975751595 | -0.6146302129536 |
| C3   | 0.4768521507195  | -2.4919783852345 | -1.3587705319242 |
| H4   | -0.0010177694142 | -1.7640858724367 | -2.0007854408137 |
| C5   | 0.0381747020334  | -3.8072874062495 | -1.2928551820512 |
| H6   | -0.7980190292918 | -4.1270466747573 | -1.9048312298328 |
| C7   | 0.6867023355328  | -4.6874416601932 | -0.4243792902453 |
| H8   | 0.3656498100998  | -5.7213077943352 | -0.3448083734910 |
| C9   | 1.7511206939161  | -4.2262296021278 | 0.3439617952684  |
| H10  | 2.2610359353959  | -4.8961380887162 | 1.0253359279744  |
| C11  | 2.1535827999575  | -2.8918136934298 | 0.2316516198024  |
| C12  | 3.2682083614342  | -2.2895613303870 | 0.9804116743176  |

|     |                  |                  |                  |
|-----|------------------|------------------|------------------|
| C13 | 4.0626988300573  | -2.9835809860827 | 1.8943086415255  |
| H14 | 3.8750671407462  | -4.0291467219981 | 2.1052614996774  |
| C15 | 5.1045271614554  | -2.3154966972609 | 2.5350045880452  |
| H16 | 5.7330258633335  | -2.8405943081362 | 3.2471765615753  |
| C17 | 5.3259116072838  | -0.9706139850293 | 2.2464951718751  |
| H18 | 6.1277686848536  | -0.4149306171851 | 2.7201404489128  |
| C19 | 4.4989305107006  | -0.3277572445275 | 1.3294353483262  |
| H20 | 4.6337595922074  | 0.7202406836964  | 1.0851184071293  |
| N21 | 3.4963780014551  | -0.9786973265821 | 0.7118658822926  |
| N22 | 0.9874676037100  | 0.8936915493484  | -2.1801668613533 |
| C23 | -0.1284449455939 | 1.5244534951461  | -1.7820149120880 |
| C24 | -0.8500300010666 | 2.3372210263148  | -2.6467187204979 |
| H25 | -1.7412535400739 | 2.8404745386000  | -2.2877126171299 |
| C26 | -0.4052956982652 | 2.4395348424114  | -3.9681011647200 |
| H27 | -0.9395857688955 | 3.0639041216285  | -4.6772498736541 |
| C28 | 0.6937826713125  | 1.6918201593883  | -4.3932861939569 |
| H29 | 0.9915943055995  | 1.7111398813811  | -5.4349544758487 |
| C30 | 1.3862835676369  | 0.9001741986207  | -3.4693794552867 |
| C31 | 2.4764461918041  | -0.0491672547657 | -3.7847792093323 |
| C32 | 3.0696167197539  | -0.1643919140927 | -5.0424042877245 |
| H33 | 2.7826768374047  | 0.4977428099059  | -5.8507479880619 |
| C34 | 4.0457121641435  | -1.1385524930215 | -5.2496814069386 |
| H35 | 4.5190659348660  | -1.2370269278532 | -6.2214526719680 |
| C36 | 4.4044508792418  | -1.9776418305135 | -4.1967283993190 |
| H37 | 5.1569517520255  | -2.7489024819562 | -4.3189829807184 |
| C38 | 3.7800652394011  | -1.8027747306319 | -2.9633030894897 |
| H39 | 4.0385823399164  | -2.4209290937785 | -2.1100442466260 |
| N40 | 2.8397518517027  | -0.8714971201383 | -2.7655289295033 |
| C41 | -0.5807385980501 | 1.1544923562010  | -0.4008239090484 |
| O43 | -1.4114423061719 | 1.7544360201209  | 0.2352143997897  |
| O44 | 3.6025871124212  | 0.9522816494511  | -1.1775365092274 |
| O45 | 1.9145886935399  | 1.3720357866911  | 0.7631268697292  |
| H46 | 1.1068813774304  | 0.8286389507591  | 2.0069637993888  |
| H47 | 2.7251246000210  | 1.9203449477793  | 0.8674075326468  |
| O49 | 4.2089088313622  | 2.9005007748031  | 1.0422199023629  |
| H50 | 4.4806921075276  | 3.3744909466694  | 0.2447337882024  |
| H51 | 4.2539182706255  | 3.5487116283728  | 1.7588621395824  |
| O51 | 0.3532087631891  | 0.2269388450416  | 2.3449103207215  |



H53 -0.3103185861838 0.7666057399244 2.8045368172692

### Figure S1i

**E (M06/LACV3P\*\*++ 2f(Ru)) = -1576.1125944554**

**ZPE (kcal mol<sup>-1</sup>) = 255.136**

**G<sub>solv</sub> = -0.2244191**

**DH<sub>298</sub> (kcal mol<sup>-1</sup>) = 19.342**

**DS<sub>298</sub> (cal K<sup>-1</sup> mol<sup>-1</sup>) = 192.199**

Cartesian coordinates

| atom | x                | y                | z                |
|------|------------------|------------------|------------------|
| O42  | 0.0000000000000  | 0.0000000000000  | 0.0000000000000  |
| H52  | 0.0000000000000  | 0.0000000000000  | 0.9931053769000  |
| Ru1  | 3.1938766838406  | 0.0000000000000  | -1.7220862815942 |
| N2   | 2.6522392785238  | -2.0267490112695 | -1.0719720574922 |
| C3   | 1.4400797747469  | -2.5848697047981 | -1.2289438799393 |
| H4   | 0.6916519323033  | -1.9817051930974 | -1.7267049516059 |
| C5   | 1.1535774737960  | -3.8600672562496 | -0.7541295625660 |
| H6   | 0.1642847681653  | -4.2802525634034 | -0.8971516788530 |
| C7   | 2.1574269684401  | -4.5677657266422 | -0.0942125973042 |
| H8   | 1.9693451916232  | -5.5652146762701 | 0.2903823068241  |
| C9   | 3.4108208792714  | -3.9825486405657 | 0.0717364312844  |
| H10  | 4.1946688700401  | -4.5233901244767 | 0.5868306671682  |
| C11  | 3.6406781801713  | -2.6993552784953 | -0.4286777320630 |
| C12  | 4.9313532463341  | -1.9883171556231 | -0.3134506069873 |
| C13  | 6.0585362511688  | -2.5130503172463 | 0.3229192121687  |
| H14  | 6.0241759524094  | -3.4940737277527 | 0.7798879513595  |
| C15  | 7.2324564921366  | -1.7632331637965 | 0.3728213984386  |
| H16  | 8.1121022086054  | -2.1619903815540 | 0.8680654591833  |
| C17  | 7.2631735056075  | -0.5011229027212 | -0.2187232551883 |
| H18  | 8.1568079931571  | 0.1130866467491  | -0.2038770215669 |
| C19  | 6.1138097070736  | -0.0262551196688 | -0.8398790039405 |
| H20  | 6.0756847423556  | 0.9450506086402  | -1.3207816260657 |
| N21  | 4.9827965066868  | -0.7538796986198 | -0.8841402165007 |
| N22  | 1.2939323241584  | 0.6205945421385  | -2.5473322068463 |
| C23  | 0.3471146115513  | 1.3373629138533  | -1.9045808265817 |
| C24  | -0.5868360891777 | 2.0996701619978  | -2.6035492711569 |
| H25  | -1.3069475830100 | 2.6900974250595  | -2.0481452153656 |

C26 -0.5810988532001 2.0661048261665 -3.9958220811424  
 H27 -1.2954449717973 2.6537908085338 -4.5635360578895  
 C28 0.3326289343130 1.2458067725312 -4.6532748164982  
 H29 0.3233364193980 1.1843905851832 -5.7340235657032  
 C30 1.2690759813149 0.5272633330855 -3.9067219475700  
 C31 2.2467424361721 -0.4056955901721 -4.5180033332196  
 C32 2.2257602066267 -0.7637388422820 -5.8687127923669  
 H33 1.4890746036442 -0.3438792546994 -6.5415140431054  
 C34 3.1609748924222 -1.6777366822348 -6.3509591954522  
 H35 3.1550498717515 -1.9579120890548 -7.3995376330787  
 C36 4.0980182088735 -2.2256914455565 -5.4760614711770  
 H37 4.8428312552723 -2.9370651695386 -5.8149645145811  
 C38 4.0684925657860 -1.8323569460768 -4.1427270770183  
 H39 4.7827526432643 -2.2148724939202 -3.4224450677208  
 N40 3.1660922358149 -0.9532868838896 -3.6817267583167  
 C41 0.2016062553730 1.2560709460806 -0.3983505716596  
 O43 0.1527994571869 2.2418641147355 0.3071922232458  
 O44 4.0797745571683 1.2452803300087 -2.5373635867177  
 O45 2.6678336621761 0.6558526680921 -0.0618896745964  
 H46 0.4029914608219 1.5223906817490 2.2511474059782  
 H47 3.0868267409356 0.3214726202938 0.7929241901541  
 O49 3.1918498825589 -0.1777611997295 2.3338675218264  
 H50 3.7777223009761 0.3065560338174 2.9312255135004  
 H51 2.2803255728876 0.0318991675285 2.6293396831718  
 O51 0.4979987286707 0.6115258054034 2.5917194741290  
 H53 -0.0839870718206 0.5396470655840 3.3621025203473

**Figure S1j**

**E (M06/LACV3P\*\*++ 2f(Ru)) = -1576.06966899183**

**ZPE (kcal mol<sup>-1</sup>) = 252.82**

**G<sub>solv</sub> = -0.2266143**

**DH<sub>298</sub> (kcal mol<sup>-1</sup>) = 19.535**

**DS<sub>298</sub> (cal K<sup>-1</sup> mol<sup>-1</sup>) = 197.886**

Cartesian coordinates

| atom | x            | y            | z            |
|------|--------------|--------------|--------------|
| Ru1  | 3.5702042631 | 6.1845748575 | 1.6660970984 |
| N2   | 2.5739322566 | 5.0349647838 | 3.2267565071 |
| C3   | 3.1443961181 | 4.5801219225 | 4.3573386770 |

|     |               |               |               |
|-----|---------------|---------------|---------------|
| H4  | 4.1684121378  | 4.8842991565  | 4.5389717762  |
| C5  | 2.4746129428  | 3.7551265901  | 5.2515285644  |
| H6  | 2.9750989095  | 3.4092672843  | 6.1491945599  |
| C7  | 1.1624424816  | 3.3847039952  | 4.9584175020  |
| H8  | 0.6083695886  | 2.7354919546  | 5.6289424170  |
| C9  | 0.5664839649  | 3.8573385675  | 3.7922002430  |
| H10 | -0.4516815628 | 3.5747044297  | 3.5570687613  |
| C11 | 1.2907717904  | 4.6897047758  | 2.9330313538  |
| C12 | 0.7318142383  | 5.2540654444  | 1.6853004427  |
| C13 | -0.5772667811 | 5.0268511124  | 1.2555836070  |
| H14 | -1.2436151648 | 4.3960260568  | 1.8302976084  |
| C15 | -1.0296177756 | 5.6172180681  | 0.0777847274  |
| H16 | -2.0448789750 | 5.4422928097  | -0.2633486153 |
| C17 | -0.1640334775 | 6.4314257512  | -0.6486076996 |
| H18 | -0.4760795979 | 6.9132726800  | -1.5683912504 |
| C19 | 1.1314610627  | 6.6199536349  | -0.1790552226 |
| H20 | 1.8481113455  | 7.2320639314  | -0.7129036736 |
| N21 | 1.5675174797  | 6.0437367755  | 0.9573997729  |
| N22 | 5.4049872724  | 6.0397076999  | 2.4955736630  |
| C23 | 6.1608409348  | 5.0217469890  | 2.0629656039  |
| C24 | 7.4582745168  | 4.8693436542  | 2.5392643473  |
| H25 | 8.0693295696  | 4.0474158789  | 2.1826922749  |
| C26 | 7.9215044021  | 5.8058112744  | 3.4719891869  |
| H27 | 8.9286293200  | 5.7196450996  | 3.8680836209  |
| C28 | 7.1049076451  | 6.8572266958  | 3.9040917612  |
| H29 | 7.4810933751  | 7.5735062895  | 4.6255317515  |
| C30 | 5.8085309311  | 6.9654412529  | 3.3882138824  |
| C31 | 4.7776266904  | 7.9843917821  | 3.7062195315  |
| C32 | 4.9771887949  | 9.0233993827  | 4.6135752688  |
| H33 | 5.9268815904  | 9.1272921055  | 5.1259441006  |
| C34 | 3.9468954974  | 9.9324066079  | 4.8574997527  |
| H35 | 4.0941391178  | 10.7459172354 | 5.5607080982  |
| C36 | 2.7345614377  | 9.7829337362  | 4.1888033241  |

|     |              |               |               |
|-----|--------------|---------------|---------------|
| H37 | 1.9108427990 | 10.4697904466 | 4.3488914967  |
| C38 | 2.5909053753 | 8.7256878213  | 3.2923640518  |
| H39 | 1.6704580423 | 8.5702951426  | 2.7406231247  |
| N40 | 3.5782675311 | 7.8502988874  | 3.0564800903  |
| C41 | 5.4760117293 | 4.1333291156  | 1.0373514465  |
| O42 | 4.1882424687 | 4.4327120803  | 0.8084252126  |
| O43 | 6.0688345832 | 3.2426016061  | 0.4747416826  |
| O44 | 4.1997670510 | 7.3555220973  | 0.4368687587  |
| O45 | 4.0353664636 | 7.0613571596  | -1.3230418353 |
| H46 | 3.9913560320 | 6.0418370052  | -1.5102512744 |
| O47 | 3.6725509690 | 4.6027721342  | -1.8128740692 |
| H48 | 4.0679059583 | 4.1116419508  | -2.5451116161 |
| H49 | 3.8371293132 | 4.1030236281  | -0.9889914982 |
| H50 | 4.9453189712 | 7.4296029064  | -1.5769785246 |
| O54 | 6.3834674465 | 8.0049797052  | -1.9239220703 |
| H55 | 6.8623745500 | 7.6709309397  | -2.6950989646 |
| H56 | 6.4447096211 | 8.9689147955  | -1.9760297214 |

**Figure S1k**

**E (M06/LACV3P\*\*++ 2f(Ru)) = -1499.34855671183**

**ZPE (kcal mol<sup>-1</sup>) = 230.426**

**G<sub>solv</sub> = -0.0928285**

**DH<sub>298</sub> (kcal mol<sup>-1</sup>) = 18.231**

**DS<sub>298</sub> (cal K<sup>-1</sup> mol<sup>-1</sup>) = 189.768**

Cartesian coordinates

| atom | x            | y            | z            |
|------|--------------|--------------|--------------|
| Ru1  | 3.5672650734 | 6.2708299432 | 1.7355880684 |
| N2   | 2.5486899503 | 4.9511652985 | 3.0855261458 |
| C3   | 3.1081196035 | 4.3566293067 | 4.1532451395 |
| H4   | 4.1250695893 | 4.6512831498 | 4.3852196190 |
| C5   | 2.4402228317 | 3.4091456330 | 4.9184215371 |
| H6   | 2.9354348219 | 2.9520105523 | 5.7678145448 |
| C7   | 1.1378692220 | 3.0636939314 | 4.5598567107 |
| H8   | 0.5852343179 | 2.3224752537 | 5.1280889082 |

|     |               |               |               |
|-----|---------------|---------------|---------------|
| C9  | 0.5525002034  | 3.6793416796  | 3.4588094968  |
| H10 | -0.4563515449 | 3.4164948495  | 3.1670367828  |
| C11 | 1.2789400755  | 4.6261891151  | 2.7282601192  |
| C12 | 0.7417427473  | 5.3327522169  | 1.5473274677  |
| C13 | -0.5573135164 | 5.1438871595  | 1.0663756934  |
| H14 | -1.2289526755 | 4.4481030375  | 1.5532493471  |
| C15 | -0.9853301459 | 5.8557049026  | -0.0498976192 |
| H16 | -1.9903460912 | 5.7160443956  | -0.4346724591 |
| C17 | -0.1020847822 | 6.7407571846  | -0.6640779753 |
| H18 | -0.3902238980 | 7.3106372777  | -1.5404729347 |
| C19 | 1.1794590867  | 6.8843368589  | -0.1426959019 |
| H20 | 1.9210279280  | 7.5269039940  | -0.6014904907 |
| N21 | 1.5938691080  | 6.2021952196  | 0.9403672793  |
| N22 | 5.4038783441  | 6.1027372947  | 2.5238878020  |
| C23 | 6.1599074915  | 5.1196502411  | 2.0171043105  |
| C24 | 7.4710365249  | 4.9611299312  | 2.4560591134  |
| H25 | 8.0716167373  | 4.1612602020  | 2.0378182303  |
| C26 | 7.9559083157  | 5.8505779127  | 3.4210903864  |
| H27 | 8.9741846923  | 5.7532059248  | 3.7846687807  |
| C28 | 7.1439003852  | 6.8729504520  | 3.9233771730  |
| H29 | 7.5309136981  | 7.5616958178  | 4.6655847697  |
| C30 | 5.8346169211  | 6.9885866719  | 3.4434080976  |
| C31 | 4.8074952936  | 7.9868929785  | 3.8190142907  |
| C32 | 5.0206020758  | 8.9916934914  | 4.7640965540  |
| H33 | 5.9798135633  | 9.0727670647  | 5.2626336284  |
| C34 | 3.9975042787  | 9.8887072623  | 5.0591467956  |
| H35 | 4.1547063977  | 10.6749062257 | 5.7905644825  |
| C36 | 2.7753825647  | 9.7619936249  | 4.4013209485  |
| H37 | 1.9533752035  | 10.4411396423 | 4.5985510306  |
| C38 | 2.6210839472  | 8.7396559962  | 3.4697494206  |
| H39 | 1.6925418368  | 8.6026582714  | 2.9264652155  |
| N40 | 3.6015150369  | 7.8699859187  | 3.1794084185  |
| C41 | 5.4551785765  | 4.2496664680  | 0.9687953330  |

|     |              |              |               |
|-----|--------------|--------------|---------------|
| O42 | 4.2089642398 | 4.5851302226 | 0.7185027479  |
| O43 | 6.0716048378 | 3.3277043333 | 0.4649828354  |
| O44 | 4.3739628613 | 7.5194694309 | 0.4879977746  |
| O45 | 4.0379875160 | 7.3137564222 | -0.8648344844 |
| H50 | 4.6993826960 | 7.9035113485 | -1.3175132979 |
| O54 | 5.9326929616 | 8.7419149352 | -2.1133468830 |
| H55 | 5.7058873215 | 9.3771451663 | -2.8045687753 |
| H56 | 6.5807962414 | 8.1459700282 | -2.5114831260 |

---

(<sup>i</sup>) a) A. D. Becke, *J. Chem. Phys.* **1993**, 98, 5648-5652; b) C. Lee, W. Yang, R. G. Parr, *Phys. Rev. B* 1988, **37**, 785-789.

(<sup>ii</sup>) Y. Zhao, D. G. Truhlar, *Theor. Chem. Acc.* **2006**, 120, 215-241.

(<sup>iii</sup>) J.M.L. Martin and A. Sundermann, *J. Chem. Phys.*, **2001**, 114, 3408-3420

(<sup>iv</sup>) B. Marten, K. Kim, C. Cortis, R. A. Friesner, R. B. Murphy, M. N. Ringnalda, D. Sitkoff and B. Honig, *J. Phys. Chem.*, **1996**, 100, 11775-11788.

(<sup>v</sup>) Donald D. Wagman, William H. Evans, Vivian B. Parker, Richard H. Schumm, Iva Halow, Sylvia M. Bailey, Kenneth L. Churney, and Ralph L. Nuttall, The NBS Tables of Chemical Thermodynamic Properties, *J. Phys. Chem. Ref. Data*, Vol. 11, Suppl. 2(1982).
